## RESPIRATORY AND CARDIOVASCULAR RESPONSES OF THE EXERCISING CHICKEN TO SPINAL CORD COOLING AT DIFFERENT AMBIENT TEMPERATURES

### I. CARDIOVASCULAR RESPONSES AND BLOOD GASES

By G. M. BARNAS\*, M. GLEESON† AND W. RAUTENBERG

*Ruhr-Universität Bochum, Arbeitsgruppe Temperaturregulation,  
D-4630 Bochum, F.R.G.*

*Accepted 7 August 1984*

#### SUMMARY

1. We measured oxygen consumption ( $\dot{V}_{O_2}$ ), heart rate (HR), stroke volume (SV), cardiac output (CO) and mean arterial blood pressure (MBPa) of chickens during 15 min treadmill exercise at  $0.5 \text{ ms}^{-1}$  and  $0.8 \text{ ms}^{-1}$  at thermoneutral ( $23^\circ\text{C}$ ), low ( $9^\circ\text{C}$ ) and high ( $34^\circ\text{C}$ ) ambient temperature ( $T_a$ ); the vertebral canal was cooled to  $34^\circ\text{C}$  during the middle 5 min of each exercise period.  $P_{O_2}$ ,  $P_{CO_2}$ , pH and oxygen content ( $C_{O_2}$ ) of the arterial and mixed venous blood were also measured.

2.  $\dot{V}_{O_2}$  during exercise was not significantly affected by  $T_a$ . Spinal cord cooling produced definite increases in  $\dot{V}_{O_2}$ , CO and SV during  $0.5 \text{ ms}^{-1}$  exercise at  $9^\circ\text{C}$ ; otherwise, effects of spinal cord cooling were not significant. HR, SV and CO were all linearly related to  $\dot{V}_{O_2}$ ; these relationships were unaffected by spinal cord cooling or  $T_a$ .

3. Blood pressure did not increase during exercise.

4.  $Pa_{CO_2}$  and  $Pv_{CO_2}$  did not increase significantly during exercise. The arterial-venous  $C_{O_2}$  difference was increased by exercise only at  $34^\circ\text{C}$ . The chickens generally hyperventilated at  $34^\circ\text{C}$   $T_a$  compared to the other  $T_a$  values. No consistent effect on blood gases or on pH and  $C_{O_2}$  of the blood could be attributed to spinal cord cooling.

#### INTRODUCTION

Recent studies on cardiovascular responses to bipedal exercise in the duck (Kiley, Kuhlmann & Fedde, 1979, 1982; Bech & Nomoto, 1982) and in the duck and the pigeon (Grubb, 1982), have shown that blood pressure increases during exercise, although the increases in the pigeon were not significant. The cardiac output (CO) was linearly related to oxygen consumption ( $\dot{V}_{O_2}$ ) both in the duck and pigeon (Grubb, 1982), but the relationships between heart rate (HR) or stroke volume (SV) and  $\dot{V}_{O_2}$  were more obscure. Kiley *et al.* (1979) and Bech & Nomoto (1982)

\*Stipendiat of the German Humboldt-Stiftung.

†Present address: Department of Veterinary Physiology, Royal (Dick) School of Veterinary Studies, University of Edinburgh, Edinburgh EH9 1QH, Scotland.

Key words: Thermoregulation, cardiovascular responses, birds.

found decreases in  $\text{PaCO}_2$  and  $\text{P}\bar{\text{V}}\text{O}_2$  during exercise in the ducks, but only the former reported significant changes in  $\text{PaO}_2$  (increases) and  $\text{P}\bar{\text{V}}\text{CO}_2$  (decreases).

$\dot{\text{V}}\text{O}_2$  during exercise at different  $T_a$  and running speeds has been quantified in the quail (Nomoto, Rautenberg & Iriki, 1983): steady-state  $\dot{\text{V}}\text{O}_2$  was independent of  $T_a$ . Kiley *et al.* (1982) have measured blood gases, blood pressure and HR in ducks during exercise at a low ( $-5^\circ\text{C}$ )  $T_a$  but, otherwise, the dependencies of exercising cardiovascular responses on  $T_a$  in birds are unknown.

That thermal stimulation of the spinal cord is capable of evoking thermoregulatory responses is well established in birds and mammals (see Simon, 1974 for review). For instance, spinal cord cooling in the pigeon causes immediate shivering and increases in  $\dot{\text{V}}\text{O}_2$  (Rautenberg, Necker & May, 1972) which are greater if  $T_a$  is low (Rautenberg, 1971). Increases in  $\dot{\text{V}}\text{O}_2$  caused by spinal cord cooling in the penguin are small except at low ( $-18$  to  $-22^\circ\text{C}$ ) ambient temperatures (Hammel *et al.* 1976). On the other hand, spinal cord cooling immediately inhibits panting caused by increased  $T_a$  in pigeons (Rautenberg *et al.* 1972), chickens (Richards & Avery, 1978) and ducks (Bech & Nomoto, 1982).

We have recently reported the cardiovascular and blood gas responses of pigeons (Barnas, Nomoto & Rautenberg, 1984b) and chickens (Barnas, Gleeson & Rautenberg, 1984a) to spinal cord cooling at different  $T_a$ . Responses in the pigeon were greater; however, in both birds, we found increases in  $\dot{\text{V}}\text{O}_2$ , HR and CO caused by spinal cord cooling at thermoneutral  $T_a$  and further increases during spinal cord cooling at low  $T_a$ . In all cases, CO was linearly related to  $\dot{\text{V}}\text{O}_2$ . At high  $T_a$ , CO decreased slightly during spinal cord cooling in the chicken (Barnas *et al.* 1984b) and pigeon (unpublished data).

In the present study, we combined the two types of stimulations of  $\dot{\text{V}}\text{O}_2$ , exercise and cooling (both internal and external), to test whether (1) thermoregulatory stimuli could evoke significant responses during an already elevated  $\dot{\text{V}}\text{O}_2$ , and (2) the relationship between  $\dot{\text{V}}\text{O}_2$  and CO would remain intact.

#### METHODS

##### *Animals and experimental training*

Six white Leghorn cockerels (*Gallus domesticus*), 16–19 weeks of age and weighing  $1.3 \pm 0.1$  kg were used. The cockerels were raised outdoors in the institute's animal facilities and trained to run on a treadmill about three times per week, for 3 months, at speeds of  $0.5 \text{ m s}^{-1}$  and  $0.8 \text{ m s}^{-1}$ ; training was conducted more often the week before the experiment. The treadmill was 1 m long and 14 cm wide; over it was built a 37 cm high, 55 cm long and 18 cm wide cage in which the cockerel ran. The room in which the treadmill was housed was an environmental controlled chamber. Five days prior to the first experiment with each bird, a 13 cm long loop of nylon tubing (o.d. =  $0.63$ ; i.d. =  $0.50$  mm) was implanted, under halothane anaesthesia, extradural and dorsal to the spinal cord into the 3rd thoracic through 4th cervical segments of the vertebral canal as described previously by Rautenberg (1969). The ends of the loop were later connected to a hot water pump in order to circulate water at desired temperatures within the loop. Additionally, a 5 cm length of nylon tubing, closed at the proximal end, was installed between the

two arms of the loop for subsequent placement of the thermocouple. The day before, or the morning of, the first experiment with each bird, cannulae were implanted under local anaesthesia (1% xylocaine, Astra Labs) into the brachial artery and the cutaneous ulnar vein. The position of the tip of the latter in the right atrium was checked by measurement of pressure changes or autopsy after the experiment.

#### *Experimental measurements*

Temperatures of the rectum ( $T_{re}$ ) and vertebral canal ( $T_{vc}$ ) were measured with copper constantan thermocouples (Fine Wire, California, OUS) placed either into the rectum or inserted into the previously placed cannula in the vertebral canal. These temperatures, as well as that of the ambient air near the treadmill, were recorded on a multipoint recorder (Phillips, PM8235).

Blood pressure was measured from the brachial arterial cannula and recorded on a penwriter (Gould, Brush 220); heart rate (HR) and mean arterial blood pressure (MBPa) were calculated from these recordings. Arterial and mixed venous blood samples were measured for pH,  $P_{O_2}$  and  $P_{CO_2}$  with a Radiometer Blood Micro System (BMS3 MK2) controlled at 41°C; all measurements were adjusted to the  $T_{re}$  recorded at the time the blood sample was taken (Severinghaus, 1965; Kiley *et al.* 1979). The oxygen contents of arterial and mixed venous blood,  $CaO_2$  and  $C\bar{v}O_2$  respectively, were measured with a LexO<sub>2</sub>Con apparatus (Lexington Instrument Corp.). Haematocrit was routinely measured (average of all those samples measured was about 25%) and did not decrease during an experiment; samples taken during the final experiment with each chicken tended to be slightly less (by about 3–4%) than those from the initial experiment.

During the experiments, respiration was measured using a plastic helmet suspended from the top of the cage. This helmet, and respiratory measurements during exercise, will be discussed elsewhere. Gas was drawn from the helmet at a constant, measured flow rate and dried;  $P_{O_2}$  of the gas was then measured with an O<sub>2</sub> analyser (Beckman, OM-11).

#### *Experimental procedure*

No chicken was used in more than one experiment in a day, and complete sets of experiments with each chicken lasted about 5 days. Before each experiment, the chicken was left to sit quietly for at least 1 h on the treadmill at the experimental  $T_a$ . After positioning of the thermistors, the circulation to the vertebral thermode and the helmet, the chicken was left again to sit quietly. When steady-state measurements were observed for respiration and oxygen consumption (about 30 min later), blood was sampled simultaneously from the artery and vein. We then made resting measurements of responses to spinal cord cooling; these responses are discussed in detail elsewhere (Barnas *et al.* 1984a). Control measurements, excluding blood samples, were taken again immediately before exercise – about 10 min after initial control samples – and did not significantly differ from the initial controls except for minor increases in  $\dot{V}O_2$  at 23°C.

The cockerels ran for 15 min at 0.5 m s<sup>-1</sup>, during the middle 5 min of which the

spinal cord was cooled to  $34 \pm 0.8^\circ\text{C}$  by opening the circulation of water through the vertebral thermode. Blood was sampled at 4, 9 and 14 min of the exercise. Another set of control samples were taken 20 min after the end of the exercise. Shortly afterwards, a second exercise period, this time at  $0.8 \text{ ms}^{-1}$ , was attempted during experiments at 23 and  $9^\circ\text{C}$ . However, not all cockerels completed the second 15 min exercise period.

Four birds successfully completed at least the first exercise period at  $T_a$  of 9, 23 and  $34^\circ\text{C}$ . One bird ran only at the high and low  $T_a$ , another bird only at 23 and  $34^\circ\text{C}$ . No attempt was made either to systematize or randomize the order of  $T_a$  in which a chicken ran.

#### Data analysis

Oxygen consumption ( $\dot{V}_{O_2}$ ) was calculated from the corrected volume of gas (STDP) flow and  $P_{O_2}$  of the gas leaving the helmet. The difference between arterial and mixed venous  $\text{CO}_2$  ( $\Delta\text{CO}_2$ ) was used to calculate cardiac output (CO) by the direct Fick method; CO was divided by HR to give stroke volume (SV). Paired *t*-tests were performed on the differences between each measured variable caused by spinal cord cooling, exercise and changes in  $T_a$ . We also performed linear regressions of CO, SV, HR and  $\Delta\text{CO}_2$  on  $\dot{V}_{O_2}$  at each  $T_a$  and tested (student's *t*-test,  $P < 0.05$ ) whether the slopes and zero-intercepts of the regressions were affected by  $T_a$  or by the inclusion of values during spinal cord cooling.

#### RESULTS

The responses of  $\dot{V}_{O_2}$ , HR, SV, CO and BP to spinal cord cooling during two levels of 15-min treadmill exercise at three different  $T_a$  are depicted in Fig. 1. The following points should be noted.

(1) Although  $\dot{V}_{O_2}$  appears slightly higher during thermoneutral than low  $T_a$  at both running speeds, these differences were not significant when values from the same cockerels were compared using a paired *t*-test.

(2)  $\dot{V}_{O_2}$  responses to spinal cord cooling were small compared with the responses to exercise. It is difficult to be certain that increases in some variables during the spinal cord cooling periods are the result of spinal cord cooling alone or whether they result partly from the general increases with the continuation of exercise. For example, CO during the first exercise at  $23^\circ\text{C}$  and  $\dot{V}_{O_2}$ , HR, SV and CO during exercise at high  $T_a$  increase during spinal cord cooling but remain elevated after

Fig. 1. Oxygen consumption ( $\dot{V}_{O_2}$ ), heart rate (HR), mean arterial blood pressure (MBPa), stroke volume (SV) and cardiac output (CO) of chickens at two levels of 15 min treadmill exercise at  $9^\circ\text{C}$  and  $23^\circ\text{C}$   $T_a$  and one level at  $34^\circ\text{C}$ . The spinal cord was cooled to  $34^\circ\text{C}$  during the middle 5 min of each exercise period (shaded areas). Open circles represent resting values.  $N = 5$  at  $9^\circ\text{C}$  and  $23^\circ\text{C}$  except for the last and next to last points at  $0.8 \text{ ms}^{-1}$  where  $N = 3$ .  $N = 6$  at  $34^\circ\text{C}$   $T_a$  except for the second resting value where  $N = 5$ . Values for all variables, except MBPa, during each exercise period were significantly different ( $P < 0.05$ , paired *t*-test) from the preceding resting value. No significant changes in MBPa were observed except that resting MBPa at  $9^\circ\text{C}$  was high. Other significant differences ( $P < 0.05$ , paired *t*-test) are indicated by letters adjacent to s.e. bars: *b*, different from corresponding value at  $23^\circ\text{C}$ ; *c*, different from corresponding value at  $9^\circ\text{C}$ ; *d*, different from 4th min of exercise period; *e*, different from 14th min of exercise period.

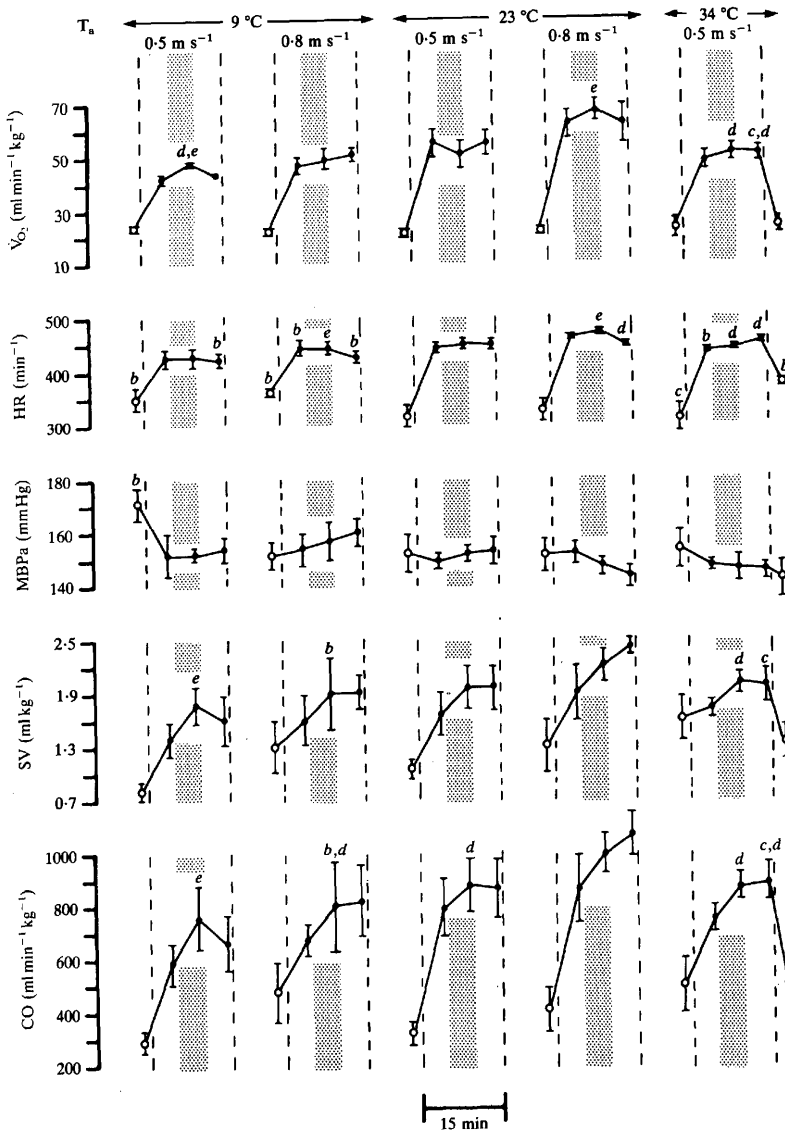

Fig. 1

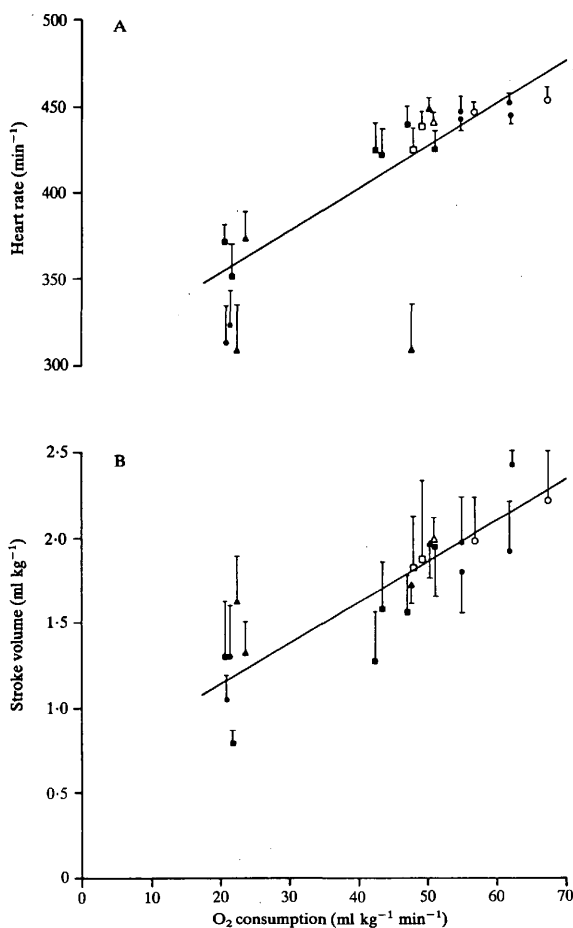

Fig. 2. The relationships of average heart rate (A) and stroke volume (B) to oxygen consumption of chickens at rest (oxygen consumption values 18–24  $\text{ml kg}^{-1} \text{min}^{-1}$ ), during exercise (closed symbols) and during spinal cord cooling during exercise (open symbols). Circles, 23°C; squares, 9°C; and triangles, 34°C. Vertical bars indicate s.e. of stroke volume and heart rate. s.e. of oxygen consumption can be seen as horizontal bars in Fig. 3. Linear regressions of the individual points are indicated by solid lines; see text for formulae.

the cooling. However, increases in  $\dot{V}_{O_2}$  during the cooling were significant at the first running period at 9°C and were reversed upon termination of cooling; there were corresponding increases and decreases in CO and SV. Such changes were also observed during rest (Barnas *et al.* 1984a) and are most likely to represent a response to spinal cord cooling.

(3) Blood pressure was not consistently changed by exercise, spinal cord cooling or  $T_a$ , although control values at low  $T_a$  were high.

The relationships between HR and  $\dot{V}_{O_2}$  and between SV and  $\dot{V}_{O_2}$  are shown in Fig. 2 while that between CO and  $\dot{V}_{O_2}$  is shown in Fig. 3. Points represent averages for control, exercise and spinal cord cooling at each  $T_a$ . The slopes of the linear regressions calculated for the individual data at each  $T_a$  separately were not significantly different from each other; likewise, the intercepts did not significantly change with  $T_a$ . Including the values obtained during spinal cord cooling did not significantly alter the slope or intercept of any linear regression. The linear regressions of the individual points from all  $T_a$  combined ( $N = 102$ ) were:

$$\begin{aligned} \text{CO} &= 13.8\dot{V}_{O_2} + 100.0; r = 0.80, \\ \text{HR} &= 2.5\dot{V}_{O_2} + 303.1; r = 0.73, \\ \text{SV} &= 0.02\dot{V}_{O_2} + 0.65; r = 0.66, \end{aligned}$$

where the units for CO and  $\dot{V}_{O_2}$  were  $\text{ml kg}^{-1} \text{ min}^{-1}$  and those for HR and SV were  $\text{min}^{-1}$  and  $\text{ml kg}^{-1}$ , respectively.

$P_{\text{CO}_2}$ ,  $P_{\text{O}_2}$ , pH and  $\text{CO}_2$  of the arterial and mixed venous blood, and the arterial-venous  $\text{CO}_2$  difference during two levels of 15 min treadmill exercise and three different  $T_a$  are shown in Fig. 4. The following points should be noted.

(1) At all temperatures, there is a general tendency for  $\text{Pa}_{\text{CO}_2}$  to decrease from control values as exercise progresses, and for  $\text{P}\dot{V}_{\text{CO}_2}$  to increase slightly at the beginning of exercise and then decrease.

(2) There are significant decreases in  $\text{P}\dot{V}_{\text{O}_2}$  and  $\text{C}\dot{V}_{\text{O}_2}$  with exercise at 23 and 34°C; at 9°C, the tendencies are the same, though not significant.

(3) The cockerels seemed to hyperventilate slightly at 34°C compared with their responses to the lower  $T_a$ : control  $\text{Pa}_{\text{CO}_2}$  and  $\text{P}\dot{V}_{\text{O}_2}$  during exercise were less than at the other  $T_a$ , while  $\text{Pa}_{\text{O}_2}$  and  $\text{pH}_a$  were generally higher.

(4)  $\text{Ca}_{\text{O}_2}$ , on the other hand, was decreased at 34°C  $T_a$ ;  $\Delta\text{CO}_2$  at rest was also less. Only at 34°C  $T_a$  were changes (increases) in  $\Delta\text{CO}_2$  significant; unlike at the other  $T_a$ ,  $\Delta\text{CO}_2$  (vol %) was significantly related to  $\dot{V}_{O_2}$  at 34°C ( $r = 0.58$ ,  $N = 29$ ):

$$\Delta\text{CO}_2 = 0.04\dot{V}_{O_2} + 4.17.$$

(5) No consistent effect could be attributed to spinal cord cooling.

#### DISCUSSION

Our linear regressions for the increases in CO with increasing  $\dot{V}_{O_2}$  are steeper (larger slope, lower intercept) than those found by Grubb (1982) in either the duck or pigeon during treadmill exercise. She also found, in contrast to our findings, only

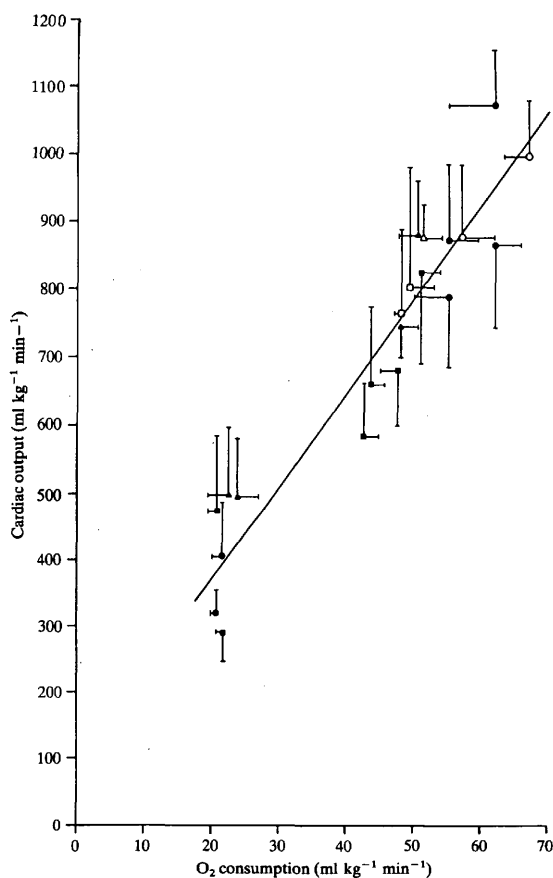

Fig. 3. The relationship between cardiac output and oxygen consumption of chickens during rest, exercise and spinal cord cooling during exercise. See Fig. 1 for explanation of symbols and *N. s.e.* of oxygen consumption and cardiac output are indicated by horizontal and vertical bars, respectively. Linear regression of the individual points is indicated by a solid line; see text for formula.

Fig. 4. pH,  $P_{CO_2}$ ,  $P_{O_2}$  and  $CO_2$  in the arterial (a) and mixed venous ( $\bar{v}$ ) blood of chickens at two levels of 15 min treadmill exercise at  $T_a$  of 9°C and 23°C and one level at 34°C. The spinal cord was cooled to 34°C during the middle 5 min of each exercise period. See Fig. 1 for explanation of symbols and *N*; in addition, here *a* = significant difference from preceding control ( $P < 0.05$ , paired *t*-test).



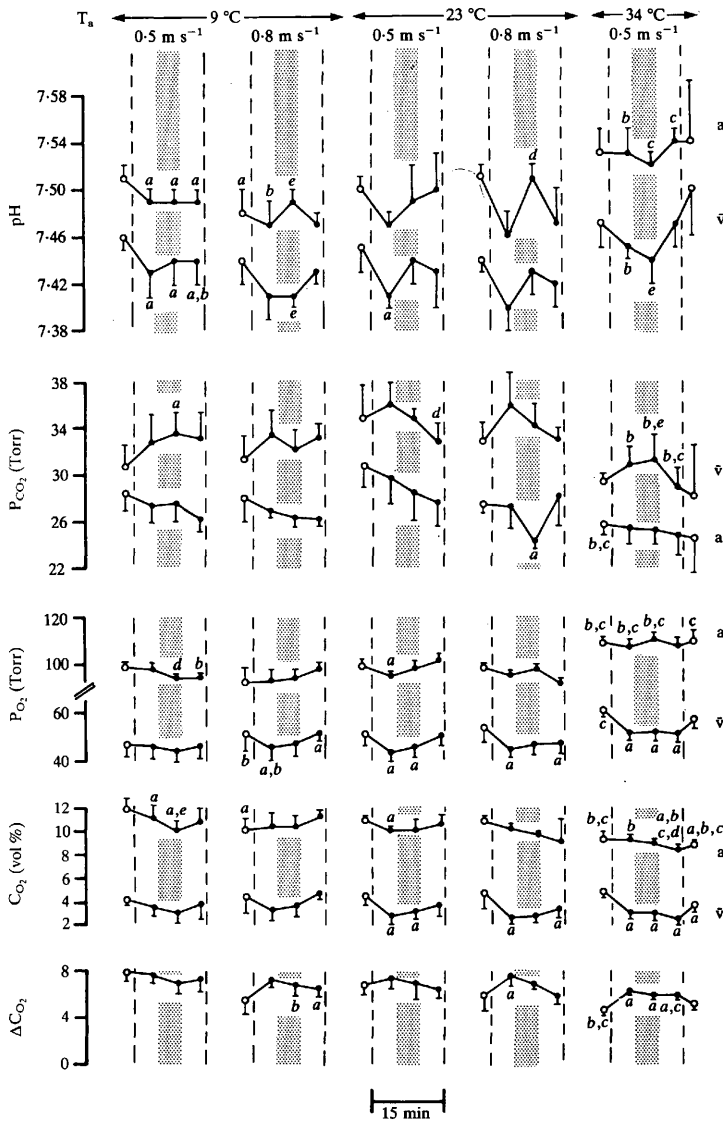

Fig. 4

weak correlations between HR and  $\dot{V}_{O_2}$ . These may indicate some species differences. However, our regressions include more points, especially at the higher levels of  $\dot{V}_{O_2}$ , which would increase the accuracy of regression analysis. Thus, the differences in the calculated regressions may result from the use of a different protocol rather than a different species.

The response of SV to treadmill exercise in the duck is different from that of chickens and pigeons. Grubb (1982) found, as we did in the chicken, a significant correlation between SV and  $\dot{V}_{O_2}$  in the exercising pigeon; no such correlation was observed in the duck. Bech & Nomoto (1982) report, in fact, slight decreases in SV with exercise in the duck. One possible cause for these differences may be the influence of training on cardiovascular adjustments to exercise, which is unknown in the bird. The 'domestic racing pigeons' used by Grubb (1982) were accustomed to exercise during their lifetimes. The ducks from the experiments of Grubb (1982) trained for short periods on 4–5 consecutive days before the experiment; those of Bech & Nomoto (1982) were trained for 6–8 weeks. Otherwise, it can be assumed that the ducks had no rigorous running training. Furthermore, since swimming is the most natural mode of locomotion for the species, cardiovascular performance can be expected to be poor during treadmill exercise in the duck. It may be that the intensive training undergone from a young age by the chickens in our study and the flying experience in the racing pigeons facilitated increases in stroke volume at any level of exercise, as does training in man (Blomqvist, 1983).

Exercise did not consistently affect blood pressure in our cockerels which contrasts with previous reports in ducks (Kiley *et al.* 1979; Grubb, 1982; Bech & Nomoto, 1982). Increases in blood pressure measured during treadmill exercise in the domestic racing pigeon were not statistically significant (Grubb, 1982), and the trained, flying pigeon showed no increases in blood pressure compared to rest (Butler, West & Jones, 1977). Again, either species differences or the effect of training may be involved.

There is a tendency for  $P_{aCO_2}$  to decrease and for  $P\bar{v}CO_2$  to stay the same or decrease slightly during treadmill exercise in ducks (Kiley *et al.* 1979, 1982; Bech & Nomoto, 1982). During flying in the pigeon, a decrease in  $P_{aCO_2}$  of over 10 Torr has been measured (Butler *et al.* 1977). Our results are in qualitative agreement with these findings.

The receptors responsible for mediating the large increases in respiration and cardiac output needed to effect such responses are unknown, since central and carotid chemoreceptor stimulation would lessen; moreover, Kiley *et al.* (1982) and Kiley & Fedde (1983) have shown that neither intrapulmonary chemoreceptivity nor changes in body temperature are solely responsible for the hyperpnea during exercise. In mammals, it is also unclear as to which receptors are responsible for effecting cardiovascular and respiratory responses during exercise, although much evidence suggests that increased discharge frequency of group III and IV afferents from the muscles due to metabolic changes may be important (Whipp, 1981). In the present study, temperature stimulation by neither ambient nor spinal cord cooling had independent effects on CO, HR or SV; that is, the increases in these variables depended only on  $\dot{V}_{O_2}$ . We suggest, therefore, that the cardiovascular changes measured in the present study resulted from stimulation of muscle afferents due to

increased metabolism, although the effects of movement on these afferents cannot be ruled out.

$\dot{V}_{O_2}$  was not significantly different for a given level of exercise at different  $T_a$ . This is not surprising since Nomoto *et al.* (1983) found similar results in the quail, and independence of exercising  $\dot{V}_{O_2}$  from  $T_a$  has often been observed in man (Astrand & Rodahl, 1970; Rowell, 1974). This implies that thermoregulatory responses of  $\dot{V}_{O_2}$  to  $T_a$  were small compared to the elevated  $\dot{V}_{O_2}$  during exercise. However, the exercising chicken is capable of responding to thermal stimulation of the spinal cord at 9°C  $T_a$  (Fig. 1). The increment of  $\dot{V}_{O_2}$  during the spinal cord cooling probably resulted from shivering, although we were not able to record EMG from the muscles during running. Nomoto *et al.* (1984) have recently given evidence that shivering can be evoked by spinal cord cooling during exercise in the pigeon. Shivering can also occur during exercise at  $T_a$  of 10°C in man (Hong & Nadel, 1979); this shivering is suppressed by increased exercise intensity. Whether shivering could be evoked during exercise in birds if  $T_a$  and exercise intensity are low enough has not been studied and warrants future investigation.

That the increase in  $\dot{V}_{O_2}$  at 23°C when the spinal cord was cooled during exercise was not significant in the present study is not unexpected since the response during rest was also small at 23°C (Barnas *et al.* 1984a). The lack of any blood gas changes evoked by spinal cord cooling was also observed at rest.

The chickens generally showed decreases in  $P_{aCO_2}$  and  $P\dot{V}CO_2$ , and increases in  $pH_a$  and  $Pa_{O_2}$  at the high  $T_a$  compared to the other  $T_a$ . This is probably due to hyperventilation (i.e. a decrease in oxygen extraction from the inhaled air) in response to thermoregulatory needs.

The authors wish to thank Bärbel May-Rautenberg, Joachim Ostheim and Udo Beckman for their technical assistance, and Linda Kohanyi for preparing the manuscript.

#### REFERENCES

- ASTRAND, P. & RODAHL, K. (1970). Temperature regulation. In *Textbook of Work Physiology*, pp. 491–536. New York: McGraw-Hill.
- BARNAS, G. M., GLEESON, M. & RAUTENBERG, W. (1984a). Respiratory and cardiovascular responses of chickens to spinal cord cooling at different ambient temperatures. *J. comp. Physiol.* (in press).
- BARNAS, G. M., NOMOTO, S. & RAUTENBERG, W. (1984b). Cardiovascular and blood gas responses of pigeons to external and internal cooling. *Pflügers Arch. ges. Physiol.* (in press).
- BECH, C. & NOMOTO, S. (1982). Cardiovascular changes associated with treadmill running in the Pekin duck. *J. exp. Biol.* **97**, 345–358.
- BLOMQUIST, C. G. (1983). Cardiovascular adaptation to physical training. *A. Rev. Physiol.* **45**, 169–189.
- BUTLER, P. J., WEST, N. H. & JONES, D. R. (1977). Respiratory and cardiovascular responses of the pigeon to sustained, level flight in a wind tunnel. *J. exp. Biol.* **71**, 7–26.
- GRUBB, B. R. (1982). Cardiac output and stroke volume in exercising ducks and pigeons. *J. appl. Physiol.: Respir. Environ. Ex. Physiol.* **53**, 207–211.
- HAMMEL, H. T., MAGGERT, J., KAUL, R., SIMON, E. & SIMON-OPPERMANN, CH. (1976). Effects of altering spinal cord temperature on temperature regulation in the Adelic penguin, *Pygoscelis adeliae*. *Pflügers Arch. ges. Physiol.* **362**, 1–6.
- HONG, S. & NADEL, E. R. (1979). Thermogenic control during exercise in a cold environment. *J. appl. Physiol.: Respir. Environ. Ex. Physiol.* **47**, 1084–1089.
- KILEY, J. P. & FEDDE, M. R. (1983). Exercise hyperpnea in the duck without intrapulmonary chemoreceptor involvement. *Respir. Physiol.* **53**, 355–365.

- KILEY, J. P., KUHLMANN, W. D. & FEDDE, M. R. (1979). Respiratory and cardiovascular responses to exercise in the duck. *J. appl. Physiol.: Respir. Environ. Ex. Physiol.* **47**, 827–833.
- KILEY, J. P., KUHLMANN, W. D. & FEDDE, M. R. (1982). Ventilatory and blood gas adjustments in exercising isothermic ducks. *J. comp. Physiol.* **147**, 107–112.
- NOMOTO, S., NOMOTO-KOZAWA, E. & IRIKI, M. (1984). Shivering during exercise in the pigeon. In *Thermal Physiology*, (ed. J. R. S. Hales). London: Raven Press (in press).
- NOMOTO, S., RAUTENBERG, W. & IRIKI, M. (1983). Temperature regulation during exercise in the Japanese quail (*Coturnix coturnix japonica*). *J. comp. Physiol.* **149**, 519–525.
- RAUTENBERG, W. (1969). Die Bedeutung der zentralnervösen Thermosensitivität für die Temperaturregulation der Taube. *Z. vergl. Physiol.* **62**, 235–266.
- RAUTENBERG, W. (1971). The influence of the skin temperature on the thermoregulatory system of pigeons. *J. Physiol., Paris* **63**, 396–398.
- RAUTENBERG, W., NECKER, R. & MAY, B. (1972). Thermoregulatory responses of the pigeon to changes of the brain and the spinal cord temperatures. *Pflügers Arch. ges. Physiol.* **338**, 31–42.
- RICHARDS, S. A. & AVERY, P. (1978). Central nervous mechanisms regulating thermal panting. In *Respiratory Function in Birds, Adult and Embryonic*, (ed. J. Piiper), pp. 204–310. Berlin, Heidelberg, New York: Springer-Verlag.
- ROWELL, L. B. (1974). Human cardiovascular adjustments to exercise and thermal stress. *Physiol. Rev.* **54**, 75–159.
- SEVERINGHAUS, J. W. (1965). Blood gas concentrations. In *Handbook of Physiology*, Vol. 1, *Respiration*, (eds W. O. Fenn & H. Rahn), pp. 1475–1487. Washington, D.C.: American Physiological Society.
- SIMON, E. (1974). Temperature regulation: the spinal cord as a site of extrahypothalamic thermoregulation functions. *Rev. Physiol. Biochem. Pharmacol.* **71**, 1–76.
- WHIPP, B. J. (1981). The control of exercise hyperpnea. In *Regulation of Breathing*, Part II, (ed. T. F. Hornbein), pp. 1069–1139. New York: Marcel Dekker.
